# Supplementary material
Source: publisher figshare collection journal article supplement (https://acs.figshare.com/ndownloader/files/23022041)
Supplement: Supplementary file 1 [file 23022041]

## Raman spectroscopy applied to monitor furfural liquid-phase oxidation catalyzed by supported gold nanoparticles

Joëlle Thuriot-Roukos,<sup>\*</sup> <sup>‡</sup> Romaissa Khadraoui, <sup>‡</sup> Sébastien Paul<sup>‡</sup> and Robert Wojcieszak<sup>‡</sup>

<sup>‡</sup> Univ. Lille, CNRS, Centrale Lille, Univ. Artois, UMR 8181 – UCCS – Unité de Catalyse et Chimie du Solide, F-59000 Lille, France

<sup>\*</sup> Email: joelle.thuriot-roukos@univ-lille.fr

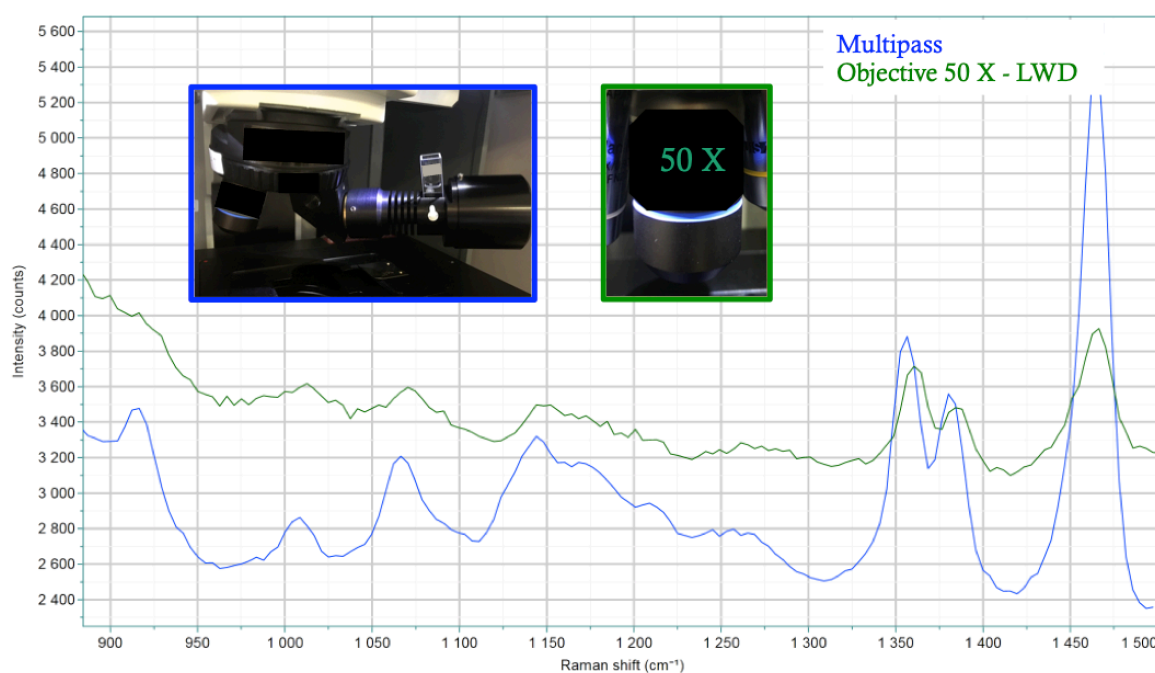

Figure S1: Comparison of the analysis of [furfural]= 64 mmol.L<sup>-1</sup> by the multipass holder and conventional Raman objective (Long working distance). The multipass holder cell enables sensitivity to be increased by up to five times over the use of an objective (×50 LWD)

### Calculation of conversion, selectivity, yield and carbon balance:

-The conversion (X%) represents the real amount of reagent that is converted into the products. It is expressed as follow:

$$X = 100 * [n(t_0) - n(t_f)] / n(t_0)$$

Where  $n(t_0)$  is the mole number of furfural at  $t_0$  and  $n(t_f)$  is the number of moles of furfural after the reaction.

-The yield (Y%) is calculated using the number of the product moles obtained during the reaction. It is expressed as follow:

$$Y = 100 * n \text{ prod}(t_f) / n \text{ reag}(t_0)$$

-The selectivity (S%) is calculated comparing the yield to the conversion of the reagent, as follow:

$$S = 100 * Y / X$$

-The carbon balance is a very useful and necessary parameter to check the possible degradation of the furfural and it is calculated as follow:

$$C\% = C_{\text{prod}}(t_f) / [C_{\text{reag}}(t_f) - C_{\text{reag}}(t_0)]$$

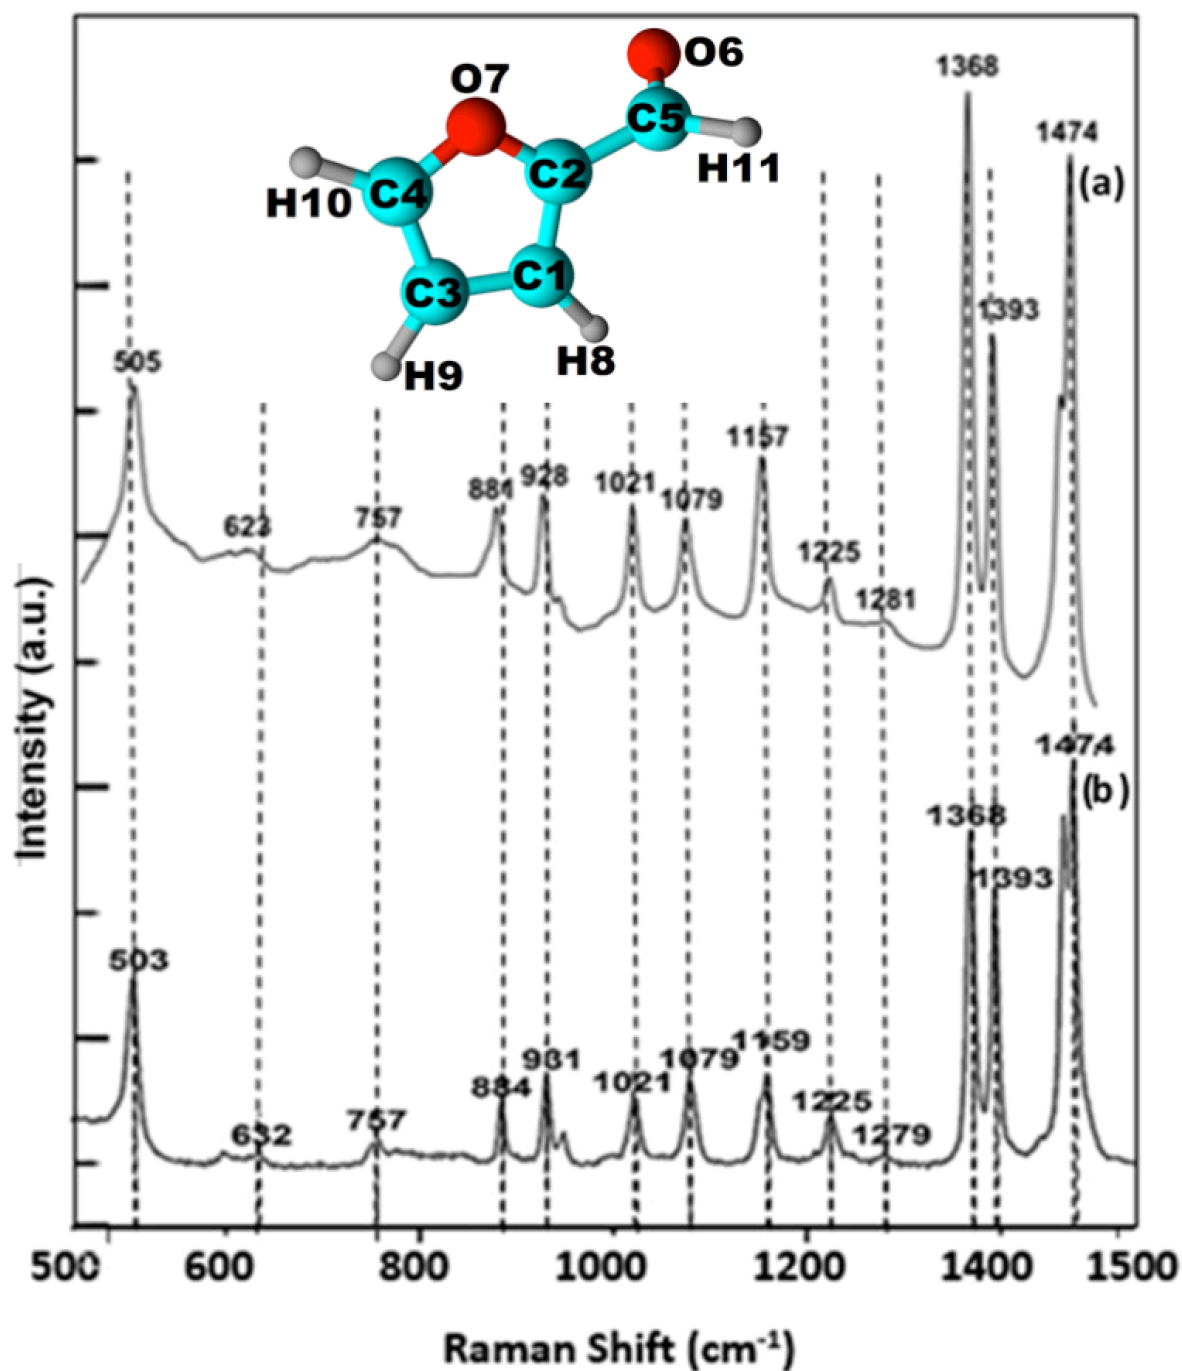

Figure S2: Full Furfural Raman spectra a) this work b) obtained by Wan *et al.* 2017  
 (Adapted in part with permission from [WAN ET AL. 2017,7(8), 210, NANOMATERIALS]. Copyright [2017] [MDPI])

Table S1: All Raman vibration mode assignments of furfural molecules & comparison with literature (Wan *et al.* 2017).

| Raman Shift (cm <sup>-1</sup> ) |                        | Vibrational plane | Vibrational mode                                                                                                              |
|---------------------------------|------------------------|-------------------|-------------------------------------------------------------------------------------------------------------------------------|
| This work                       | Wan <i>et al.</i> 2017 |                   |                                                                                                                               |
| 505                             | 503                    | In plane          | C3-C1-H8, H8-C1-C3-H9 symmetric bend                                                                                          |
| 623                             | 632                    | Out plane         | C3-C1-H8, H8-C1-C2-O7-C4 symmetric wag                                                                                        |
| 757                             | 757                    | In plane          | H9-C3-C1-C2-C5-O6-H11 sway; H8-C1-C3-H9 stretch                                                                               |
| 881                             | 884                    | Out plane         | C1-C2-C5-H11, C3-C4-H10-O7 synchronous sway; C2-C5-O6-H11 asynchronous sway                                                   |
| 928                             | 931                    | In plane          | C3-C1-H8, H8-C1-C2-O7-C4 symmetric bend                                                                                       |
| 1021                            | 1021                   | In plane          | C2-C5-O6-H11, C3-C4-H10-O7 symmetric bend; C2-C1-C3 stretch                                                                   |
| 1079                            | 1079                   | In plane          | C1-C2-C5-H11, C2-C5-O6-H11 symmetric bend; C1-C2-O7-C4 stretch                                                                |
| 1157                            | 1159                   | In plane          | C1-C2-C5-H11 sway; H8-C1-C2-O7-C4 stretch                                                                                     |
| 1225                            | 1225                   | In plane          | C3-C4-H10-O7, C1-C2-C5-H11 asynchronous sway; C2-C1-C3 stretch                                                                |
| 1281                            | 1279                   | In plane          | H8-C1-C3-H9, H8-C1-C2-O7-C4 asynchronous stretch; C2-C1-C3 stretch                                                            |
| 1368                            | 1368                   | In plane          | H9-C3-C4-H10, C1-C2-C5-H11 synchronous sway                                                                                   |
| 1393                            | 1393                   | In plane          | H8-C1-C3-H9, H8-C1-C2-O7-C4 asymmetric stretch; C2-C1-C3 stretch; H9-C3-C4-H10 sway; C2-C5-O6-H11 sway                        |
| 1474                            | 1474                   | In plane          | C1-C2-O7-C4, H8-C1-C2-O7-C4 symmetric bend; C1-C2; C3-C1-H8 synchronous stretch; H9-C3-C4-H10, C1-C2-C5-H11 asynchronous sway |

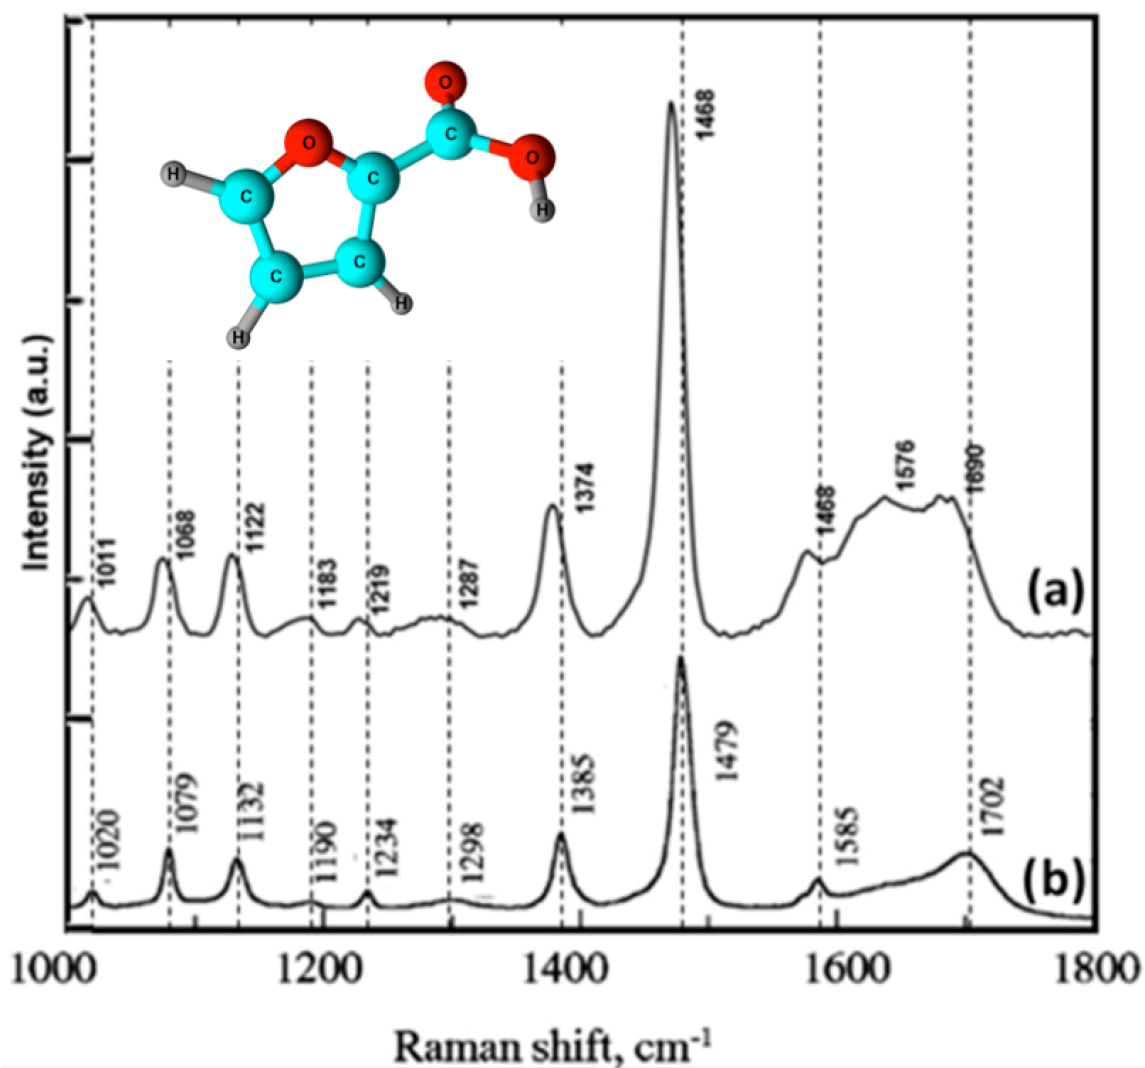

Figure S3: Furoic acid Raman spectra a) this work b) obtained by Bismondo *et al.* 2003 (Adapted in part with permission from [BISMONDO ET AL. 2003, 469-474, DALTON TRANSACTIONS]. Copyright [2003] [ROYAL SOCIETY OF CHEMISTRY])

Table S2: Comparison of all Raman Furoic acid bands obtained by our experimentation and by Bismondo *et al.* 2003

| Raman Shift ( $\text{cm}^{-1}$ ) |                             |            |
|----------------------------------|-----------------------------|------------|
| This work                        | Bismondo <i>et al.</i> 2017 | Difference |
| 1006                             | 1020                        | 14         |
| 1068                             | 1079                        | 11         |
| 1122                             | 1132                        | 10         |
| 1183                             | 1190                        | 7          |
| 1219                             | 1234                        | 15         |
| 1287                             | 1298                        | 11         |
| 1374                             | 1385                        | 11         |
| 1468                             | 1479                        | 10         |
| 1576                             | 1585                        | 11         |
| 1637 (water)                     | *                           | *          |
| 1690                             | 1702                        | 12         |

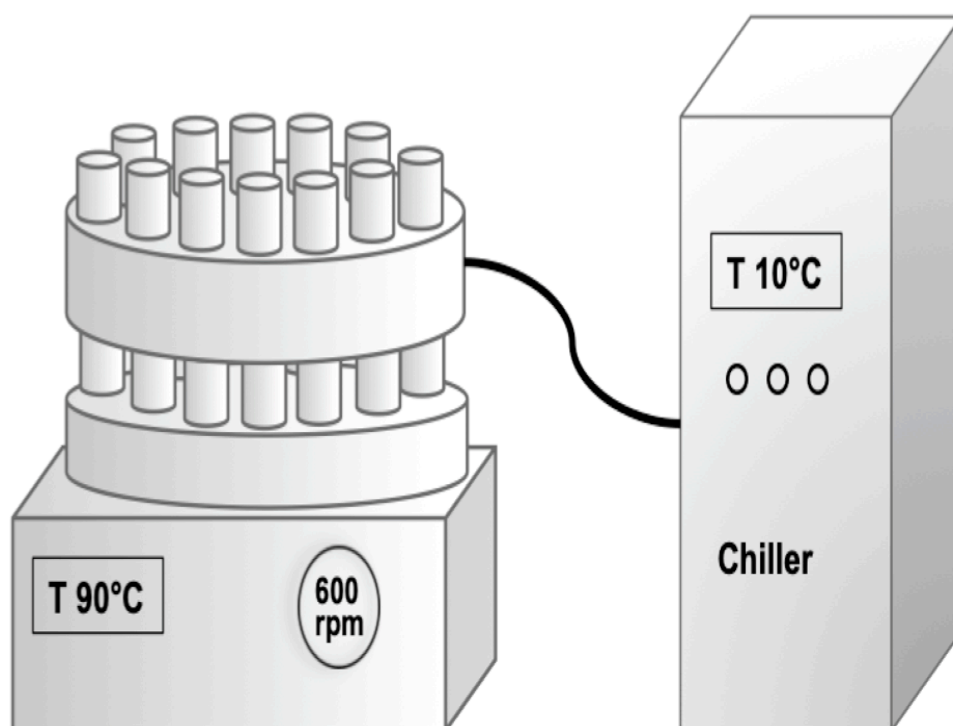

Figure S4: Schematic view of the multi-reactor system (MR)
